# Supplementary material for: Pioneer farming in southeast Europe during the early sixth millennium BC: Climate-related adaptations in the exploitation of plants and animals
Source: PubMed Central journal article supplement (PMC5959071; doi:10.1371/journal.pone.0197225), 2018-05-18
Supplement: pone.0197225.s002.pdf [file pone.0197225.s002.pdf]

**Table A.** Scores for the first six factors for Fig. 1 (PCA of sites, altitude and bioclimatic parameters bio1, 4, 6, 9, 18; Matrix: Correlation).

|     | PC 1     | PC 2      | PC 3      | PC 4      | PC 5       | PC 6       |
|-----|----------|-----------|-----------|-----------|------------|------------|
| ACH | 47.075   | 0.39947   | -0.62415  | -0.14355  | 0.22417    | 0.16191    |
| PRO | 46.696   | -0.54967  | -0.34468  | -0.055349 | 0.16972    | 0.27333    |
| GED | 45.282   | -0.6408   | -0.31834  | 0.018923  | -0.21419   | 0.19269    |
| ARG | 43.964   | -0.59115  | -0.2193   | 0.013298  | -0.26619   | 0.23551    |
| NNI | 35.643   | -12.725   | 0.38023   | 0.10841   | -0.003714  | 0.14225    |
| SES | 50.859   | 0.39608   | -0.98916  | -0.1631   | 0.061122   | 0.041548   |
| KOV | 25.824   | 0.11037   | 0.49563   | 0.12255   | 0.30688    | -0.097195  |
| BAL | 12.608   | 12.224    | 0.43356   | 0.089033  | -0.0058088 | -0.065903  |
| MAD | 13.389   | 0.029572  | 11.313    | 0.28747   | -0.16193   | -0.089836  |
| CAK | 15.087   | 0.54254   | 11.457    | 0.08744   | -0.14955   | -0.019606  |
| SER | 25.155   | 12.368    | 0.59569   | -0.12385  | -0.07573   | 0.052749   |
| AZM | 0.58028  | -0.31137  | 0.79753   | 0.42367   | -0.1348    | -0.088615  |
| YAB | 14.736   | -0.35074  | 0.57998   | 0.60871   | -0.22235   | -0.1509    |
| ILI | 21.293   | 0.37289   | 0.70251   | 0.1424    | 0.31813    | -0.10934   |
| NAB | 0.92348  | 16.351    | 0.80567   | 0.27632   | -0.3028    | -0.18274   |
| MUR | 0.47589  | 0.90831   | -0.31269  | -0.94933  | 0.0069302  | 0.042845   |
| ANZ | 0.57773  | 0.052179  | 0.35662   | -12.439   | 0.13717    | 0.12868    |
| KAD | 0.64883  | 0.27248   | 0.84101   | 0.28361   | 0.11359    | -0.085151  |
| KAR | 0.51637  | -0.098701 | 0.69563   | 0.46135   | -0.23881   | -0.10089   |
| KAZ | -0.45476 | 0.71875   | 11.558    | 0.48891   | 0.041356   | -0.099999  |
| SLA | -10.864  | 20.112    | -0.16658  | -0.56701  | 0.16139    | 0.055767   |
| BLA | -0.77639 | 12.631    | -15.574   | 0.37354   | -0.11849   | 0.006066   |
| MIE | -33.836  | 13.847    | 0.10306   | 0.56052   | -0.0095277 | 0.59842    |
| CRI | -32.588  | 14.647    | -0.009306 | 0.53935   | 0.032758   | 0.51926    |
| CAV | -17.362  | 20.902    | 0.28037   | -0.61784  | 0.31109    | -0.0096758 |
| GAL | -0.56445 | 30.387    | -0.52048  | -0.80865  | -0.17393   | -0.071581  |
| DRE | -0.16012 | 0.15913   | -15.442   | 0.27817   | -0.42272   | 0.017578   |
| RAK | -0.30849 | 42.544    | 0.25521   | 0.17338   | -0.075517  | -0.40092   |
| DIV | -0.81145 | 10.648    | -17.212   | 0.55625   | -0.033972  | 0.040446   |
| SEU | -25.593  | 0.58891   | -0.085453 | 0.40572   | 0.071273   | 0.33259    |
| FOS | -0.57548 | -0.71174  | -0.84819  | 0.15827   | -0.015104  | -0.022796  |
| END | -14.862  | -10.422   | 0.31946   | -0.1627   | -0.28322   | 0.027731   |

|     |          |           |          |           |           |           |
|-----|----------|-----------|----------|-----------|-----------|-----------|
| LUD | -0.81244 | -0.68797  | -0.43127 | -0.063515 | -0.08935  | -0.23114  |
| GOL | -10.422  | -0.018139 | -0.92275 | 0.27022   | 0.25964   | -0.15171  |
| DZH | -0.84667 | -13.863   | 0.48508  | -0.5079   | 0.012334  | 0.12498   |
| MIH | -0.80563 | -0.99186  | -0.31659 | -0.066343 | 0.23588   | -0.20815  |
| LAN | -0.91997 | -0.76025  | -0.50312 | 0.092105  | 0.12711   | -0.018772 |
| DON | -0.83687 | -0.84488  | -0.60648 | 0.11528   | 0.16723   | -0.10792  |
| KOP | -15.891  | -0.6843   | 669      | -0.42695  | 0.1107    | 0.090361  |
| FOG | -0.59836 | -0.70836  | -0.82333 | 0.17187   | -0.039413 | 0.0043809 |
| OHO | -0.85035 | -0.47753  | 16.517   | 0.74416   | 0.57857   | 0.062079  |
| ORL | -19.348  | 0.080124  | 0.66917  | -0.41783  | 0.20325   | 0.032325  |
| OVC | -0.86354 | -0.15323  | -0.20731 | -0.35212  | -0.22421  | -0.045252 |
| CUI | -0.93346 | -1.006    | -0.39045 | 0.057087  | 0.32118   | -0.14731  |
| NOS | -0.74821 | -0.58725  | -0.52014 | -0.061368 | -0.084136 | -0.24916  |
| RÖS | -10.201  | -0.83361  | -0.2264  | -0.06743  | -0.29772  | -0.058595 |
| SAM | -12.093  | -1.079    | 0.69143  | -0.53272  | 0.10954   | 0.10465   |
| SCH | -0.99984 | -10.341   | -0.25338 | -4,89E-01 | 0.28147   | -0.10294  |
| ECS | -16.161  | -10.728   | 0.38283  | -0.15065  | -0.24914  | 0.017904  |
| BUC | -0.92284 | -0.74561  | -0.42099 | 0.022749  | -0.28334  | -0.019981 |
| LV  | -0.71207 | -0.83375  | -0.68271 | 0.10842   | 0.26182   | -0.22036  |
| BER | -17.587  | -0.99464  | 0.30778  | -0.051871 | -0.17521  | 0.038671  |
| STA | 0.055552 | -0.70935  | -13.009  | 0.21946   | 0.44498   | -0.069403 |
| SZA | -1.374   | -0.99762  | 0.29458  | -0.22833  | -0.3529   | -0.015992 |
| SZO | -13.247  | -10.301   | 0.34334  | -0.27597  | -0.2928   | -0.082326 |
| TIS | -18.226  | -11.506   | 0.58961  | -0.16126  | -0.17508  | 0.030859  |
| ALS | -0.83573 | -0.94058  | -0.29251 | -0.059127 | 0.10235   | -0.051423 |

**Table B.** Scores for the first six factors for Fig. 3a (CCA ordination based on seed counts of all wild and domestic taxa).

|          | Axis 1    | Axis 2    | Axis 3    | Axis 4    | Axis 5    | Axis 6    |
|----------|-----------|-----------|-----------|-----------|-----------|-----------|
| Cicer    | 2,29518   | 4,00863   | 3,75114   | -2,17442  | 2,94434   | -5,95341  |
| Hordeum  | -0,357154 | 0,055758  | -0,692581 | -0,111886 | 0,44725   | 0,520732  |
| Lathyrus | 0,732697  | -0,19609  | -1,38265  | 0,560892  | 0,0865459 | -0,470323 |
| Lens     | 0,356228  | -0,201587 | 0,143719  | -0,321281 | -0,582803 | 0,214458  |
| Linum    | 0,0701528 | 1,9631    | 1,99429   | 0,397045  | -0,117522 | 3,40141   |
| Pisum    | 0,535003  | -0,497379 | 0,450246  | -0,936323 | 0,262615  | 0,863401  |
| Tr aest  | 0,898154  | 1,0855    | 1,77759   | 0,611007  | 0,54931   | 0,722854  |

File S2, Ivanova et al. Pioneer farming in southeast Europe during the early sixth millennium BC

|                |            |            |            |            |            |            |
|----------------|------------|------------|------------|------------|------------|------------|
| Tr dic         | 0,0337071  | 0,0762606  | -0,545292  | -0,758676  | 0,146893   | 0,164265   |
| Tr mon         | -0,0603206 | -0,132791  | -0,211461  | -0,184065  | -0,0734462 | -0,068262  |
| Vicia          | 0,980128   | 1,09298    | -0,292132  | -1,27363   | -1,5662    | 0,0382905  |
| MedFruit       | 2,73645    | -2,27589   | -1,68357   | 1,02953    | 0,647849   | -2,8583    |
| Cornus<br>mas  | -0,0717129 | -0,313087  | 0,876212   | 0,534914   | -1,38289   | -0,853325  |
| Cornus<br>sang | 1,86494    | 1,78541    | -3,44474   | -2,3651    | -0,585969  | -0,115405  |
| Corylus        | 0,662891   | -0,0173147 | -0,223125  | 2,96628    | 0,350638   | -0,787113  |
| Fragaria       | -0,574278  | 1,0894     | 1,58728    | 0,445835   | 3,23742    | 0,728381   |
| Malus          | -0,594094  | 1,57119    | 1,67344    | 0,641583   | 1,74858    | -0,319826  |
| Physalis       | -2,39456   | -0,89485   | -0,193578  | 3,61259    | 1,5052     | -1,76133   |
| Prunus         | -0,297041  | 0,140873   | -0,438759  | 1,80316    | 1,37882    | 0,909897   |
| Quercus        | 0,120845   | -4,75861   | 3,1246     | -0,487682  | 0,490399   | 0,428177   |
| Rubus          | -0,150785  | 0,913886   | 0,390639   | 2,18569    | -2,03551   | 0,148251   |
| Sambucus       | -2,8362    | 0,100951   | 0,777057   | -0,813306  | -1,47022   | -1,93583   |
| Trapa          | -4,70817   | -0,0908225 | -0,847593  | -1,20292   | 0,935262   | -0,852249  |
| Vitis          | -0,512131  | 0,215045   | -0,873639  | 0,9515     | 2,11176    | -0,584588  |
| ACH            | 0,418751   | -0,752534  | 0,463492   | 0,101398   | 0,344808   | 0,0198134  |
| ANZ            | 0,171812   | 0,173951   | -0,0632111 | -0,103168  | 0,33178    | 0,26714    |
| AZM            | 0,28777    | -0,150264  | -0,511104  | -0,324051  | 0,136393   | 0,126501   |
| BAL            | 0,11976    | -0,0334375 | -0,0606715 | -0,188234  | 0,0326773  | 0,237252   |
| BER            | -0,752924  | 0,221138   | 0,0978946  | -0,166689  | 0,217876   | -0,35603   |
| BUC            | -0,784257  | -0,64246   | 0,0897335  | 0,500978   | 0,362618   | -0,174139  |
| CAV            | 0,179839   | 0,295851   | 0,275321   | -0,0815667 | -0,215704  | 0,367336   |
| DRE            | -0,263524  | -0,102403  | 0,292769   | -0,170544  | -0,680059  | -0,24808   |
| DZH            | -0,295318  | -0,188733  | -0,122752  | 0,281129   | -0,0538262 | 0,0337528  |
| ECS            | -0,971191  | 0,091417   | -0,211935  | -0,406459  | 0,274844   | -0,0570141 |
| FOS            | 0,0229176  | -1,8178    | 1,15761    | -0,221897  | -0,0854297 | 0,0699082  |
| GAL            | 0,563777   | 0,809936   | 0,667418   | -0,563803  | 0,545308   | -0,983941  |
| GED            | 0,417097   | -0,0860072 | -0,346979  | -0,533962  | -0,122593  | 0,0717327  |
| ILI            | 0,402561   | -0,33488   | -0,488825  | 0,404164   | -0,015081  | -0,381084  |
| KAD            | 0,115446   | 0,226575   | -0,0553182 | 0,187647   | 0,0227455  | -0,286656  |
| KAR            | 0,054713   | -0,0820422 | -0,0798852 | -0,0078497 | -0,28103   | -0,192364  |
| KAZ            | 0,14788    | 0,368806   | 0,174018   | 0,0375482  | -0,374621  | 0,263666   |
| KOP            | -0,344604  | 0,253079   | 0,21931    | 0,637184   | -0,278586  | 0,33323    |
| KOV            | 0,0473412  | 0,0450985  | -0,185553  | 0,474813   | -0,0805252 | 0,0165243  |

|       |           |            |            |            |            |             |
|-------|-----------|------------|------------|------------|------------|-------------|
| MUR   | 0,0250073 | 0,121514   | -0,0995295 | 0,0411022  | 0,210581   | 0,11345     |
| NNI   | 0,139052  | -0,208523  | -0,0382492 | -0,406877  | -0,148937  | 0,242429    |
| OHO   | -0,168236 | 0,0574114  | -0,0131125 | 0,249225   | -0,0143485 | 0,271109    |
| ORL   | -0,316342 | -0,0718661 | -0,146324  | 0,0826474  | -0,0576696 | -0,082416   |
| PRO   | 0,18954   | -0,665915  | 0,113051   | -0,293894  | 6,14E-05   | 0,133172    |
| SAM   | -0,220653 | 0,0674334  | -0,0777989 | 0,427041   | 0,0603431  | 0,0910044   |
| SER   | 0,339745  | 0,0707744  | -0,485553  | 0,0125439  | -0,152173  | -0,0312371  |
| SES   | 1,18469   | -1,46487   | -0,449236  | 0,0128569  | 0,434806   | -0,842897   |
| SLA   | 0,0761322 | 0,274858   | 0,184683   | 0,21508    | -0,024604  | 0,247227    |
| TIS   | -1,6485   | 0,0120894  | -0,267784  | -0,630594  | 0,272799   | -0,286067   |
| alt   | 0,39885   | 0,483924   | 0,152583   | 0,0592948  | 0,0766318  | -0,0621527  |
| bio1  | 0,545018  | -0,48473   | -0,269303  | -0,107199  | 0,0921446  | -0,0334436  |
| bio4  | -0,70995  | 0,351094   | -0,0916662 | 0,24619    | -0,100478  | 0,324053    |
| bio6  | 0,629596  | -0,505617  | -0,212603  | -0,0987288 | 0,108781   | -0,10493    |
| bio9  | 0,591883  | -0,274314  | -0,377693  | -0,0493373 | -0,0849916 | -0,00410584 |
| bio18 | -0,65637  | 0,26896    | 0,3589     | 0,145374   | -0,16617   | 0,0820118   |

**Table C** Scores for the first six factors for Fig. 5 (CCA ordination based on bone counts of wild and domestic taxa).

|            | Axis 1    | Axis 2     | Axis 3      | Axis 4     | Axis 5     | Axis 6     |
|------------|-----------|------------|-------------|------------|------------|------------|
| Cattle     | 0,103786  | -0,972431  | -0,181137   | -0,10691   | 1,65221    | 0,038011   |
| Caprines   | 0,712188  | -0,308085  | 1,45348     | 0,196814   | -0,6489    | -0,449076  |
| Pig        | 1,7543    | 0,92629    | -1,3525     | -0,603373  | -0,363498  | 0,256781   |
| Sus scrofa | -1,13882  | 2,24157    | 0,879274    | -0,576139  | 0,838624   | 0,264501   |
| Bos prim   | -1,31002  | -0,975472  | -0,422078   | -1,71385   | -1,26648   | 0,531266   |
| Cervus     | -0,894972 | 0,176847   | -1,03746    | 1,29366    | -0,441221  | -1,46717   |
| Capreolus  | -0,362531 | -0,129611  | -0,116252   | 2,41505    | -0,590611  | 3,27637    |
| ACH        | 0,1319    | 0,0823016  | 0,0114697   | -0,0294246 | -0,129665  | 0,0190287  |
| PRO        | 0,494961  | -0,125095  | -0,0797516  | 0,223952   | 0,0712629  | -0,0625034 |
| SES        | 0,430788  | 0,101663   | -0,00680832 | 0,130732   | 0,080517   | -0,0251056 |
| ARG        | 0,348045  | -0,002273  | 0,0719829   | -0,14983   | -0,0844571 | 0,037027   |
| ANZ        | 0,310566  | -0,0201032 | 0,0555758   | -0,151207  | -0,029864  | 0,0430489  |
| KDI        | 0,144014  | 0,0148606  | 0,0145041   | -0,0777042 | 0,0289941  | 0,0323415  |
| CAK        | 0,351158  | -0,0858817 | -0,0614268  | 0,165622   | 0,0559829  | -0,0263065 |
| YAB        | 0,206063  | 0,04549    | 0,0381075   | -0,0301104 | 0,0538755  | 0,0125292  |

File S2, Ivanova et al. Pioneer farming in southeast Europe during the early sixth millennium BC

|      |             |            |             |            |             |             |
|------|-------------|------------|-------------|------------|-------------|-------------|
| KAR  | -0,0222209  | 0,106636   | -0,0562101  | -0,0550911 | -0,0343465  | -0,00576551 |
| MAD  | 0,20558     | 0,0454244  | -0,0205152  | 0,0397553  | 0,0816323   | 0,000257713 |
| NAB  | 0,389573    | -0,173268  | 0,0807318   | -0,135699  | -0,0225689  | 0,0103394   |
| MUR  | 0,0886033   | 0,192943   | -0,0429594  | 0,0613362  | 0,00393165  | -0,0227264  |
| MIE  | -0,103552   | -0,203515  | -0,0101238  | -0,0239343 | -0,0169712  | 0,0179262   |
| DIV  | -0,0222266  | -0,0316518 | -0,010339   | -0,100475  | 0,00130297  | 0,0434921   |
| CRI  | -0,34143    | -0,522003  | -0,128267   | 0,152245   | -0,015771   | -0,0189103  |
| SLA  | 0,0164299   | 0,023012   | -0,0739141  | -0,0666922 | -0,0168415  | 0,0168925   |
| RAK  | -0,100815   | 0,0573644  | -0,0936793  | -0,0398263 | -0,0111133  | -0,00269867 |
| BLA  | -0,00876075 | 0,0274228  | 0,0219243   | 0,0199269  | 0,0273362   | -0,030748   |
| SEU  | 0,388104    | -0,196445  | -0,0559462  | 0,131251   | 0,0199138   | -0,036156   |
| GOL  | -0,229765   | 0,093641   | -0,0806598  | 0,0238756  | -0,00840665 | 0,000535262 |
| LV   | -0,381416   | 0,0915446  | -0,0746973  | 0,0160388  | -0,00456054 | -0,0131633  |
| LUD  | -0,0297616  | -0,158906  | 0,137474    | 0,0135894  | -0,0504438  | -0,00947667 |
| FOG  | -0,0745171  | 0,0577486  | -0,060791   | -0,0742846 | -0,0315986  | 0,00227606  |
| KOP  | -0,0724509  | -0,144534  | 0,0512294   | 0,209314   | 0,0754951   | -0,0858401  |
| MIH  | -0,167268   | -0,136943  | 0,090178    | 0,0186089  | -0,0154016  | -0,0255471  |
| ECS  | 0,0176237   | -0,0678977 | 0,0654871   | -0,112382  | -0,0871315  | 0,0287712   |
| DON  | -0,0301695  | -0,0010921 | 0,09997     | -0,0502957 | 0,00403067  | 0,0221335   |
| LAN  | 0,056007    | -0,195776  | 0,0861526   | -0,0514645 | -0,0779403  | 0,0228306   |
| OVC  | 0,0839601   | -0,083305  | -0,139678   | 0,0252693  | 0,02951     | 0,00589062  |
| ALS  | -0,188559   | 0,124694   | -0,0369795  | 0,0149557  | 0,0130804   | 0,0352764   |
| NOS  | -0,254165   | 0,0786452  | -0,0372669  | -0,0761037 | -0,0792099  | 0,0476738   |
| RÖS  | -0,214739   | 0,0618173  | 0,0190225   | 0,0399829  | -0,0775665  | -0,023324   |
| SCH  | -0,0920608  | 0,0441795  | -0,0837191  | 0,0178439  | -0,0272525  | 0,00348331  |
| CUI  | 0,0136228   | 0,360615   | -0,0526947  | 0,300845   | 0,0791849   | -0,0691475  |
| END  | -0,0643986  | 0,0440132  | 0,081751    | -0,100127  | 0,0192299   | 0,011217    |
| BUC  | -0,149887   | -0,0731548 | 0,36164     | 0,167675   | 0,188753    | -0,04047    |
| STA  | -0,156771   | 0,124461   | -0,00817919 | -0,0247677 | 0,0628065   | 0,0222413   |
| SZA  | -0,157431   | -0,180644  | 0,193818    | -0,0757217 | 0,058957    | 0,0351179   |
| SZO  | -0,0881926  | 0,0220393  | 0,019575    | -0,0491089 | -0,0240545  | -0,00273152 |
| TIS  | -0,127548   | 0,0770038  | -0,0956395  | 0,092189   | 0,00640625  | -0,0120681  |
| FOS  | -0,0260351  | 0,0101312  | -0,0312062  | -0,0395265 | -0,00639783 | 0,00690556  |
| alt  | 0,160294    | -0,208934  | -0,31025    | -0,059217  | -0,0370908  | 0,0049236   |
| bio1 | 0,625902    | 0,261616   | 0,0496793   | 0,0603328  | 0,0120168   | -0,0228028  |
| bio4 | -0,421775   | -0,16637   | 0,148588    | 0,0597128  | 0,0512506   | -0,0521706  |

|       |          |           |            |             |            |             |
|-------|----------|-----------|------------|-------------|------------|-------------|
| bio6  | 0,524349 | 0,409495  | 0,0335351  | 0,021942    | 0,00405654 | -0,00127902 |
| bio9  | 0,691947 | 0,115287  | -0,0508155 | -0,00422625 | 0,0541121  | -0,00674867 |
| bio18 | -0,70192 | -0,237021 | -0,0693799 | 0,0464931   | -0,0108986 | -0,00770034 |

| Name | Axis 1     | Axis 2     |
|------|------------|------------|
| ACH  | -0,25982   | -0,0031676 |
| ANZ  | -0,026623  | 0,048266   |
| AZM  | -0,036447  | -0,0077217 |
| BAL  | -0,0051517 | -0,10912   |
| BER  | 0,024185   | 0,13406    |
| BUC  | -0,0075816 | 0,12778    |
| CAV  | 0,31547    | -0,02878   |
| DRE  | -0,040131  | 0,12294    |
| DZH  | -0,0056817 | 0,10212    |
| ECS  | 0,04802    | 0,11579    |
| FOS  | -0,03315   | 0,14192    |
| GAL  | 0,18262    | 0,09791    |
| GED  | -0,217     | -0,033268  |
| ILI  | -0,09234   | 0,0013834  |
| KAD  | 0,066537   | -0,17959   |
| KAR  | 0,053756   | -0,095426  |
| KAZ  | 0,2179     | -0,095879  |
| KOP  | 0,048672   | 0,1701     |
| KOV  | -0,080416  | -0,076703  |
| MUR  | 0,15563    | -0,23927   |
| NNI  | -0,14426   | -0,25382   |
| OHO  | 0,018673   | 0,077978   |
| ORL  | 0,056637   | 0,090772   |
| PRO  | -0,21529   | -0,14145   |
| SAM  | 0,0070724  | 0,10726    |
| SER  | -0,066343  | -0,12261   |
| SES  | -0,2587    | 0,033524   |
| SLA  | 0,27027    | -0,1109    |
| TIS  | 0,023493   | 0,12589    |

**Table D.** Scores for Fig. 3b (NMDS ordination based on seed counts of domestic taxa only).

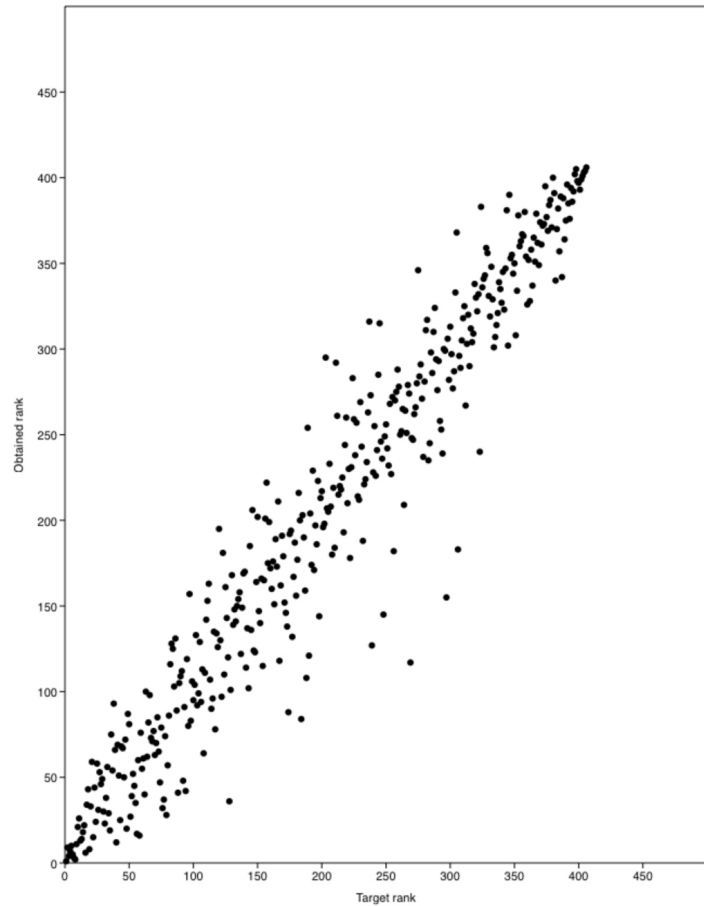

**Plot A.** Shepard plot for Fig. 3b (NMDS ordination based on seed counts of domestic taxa only). Stress: 0.1309.

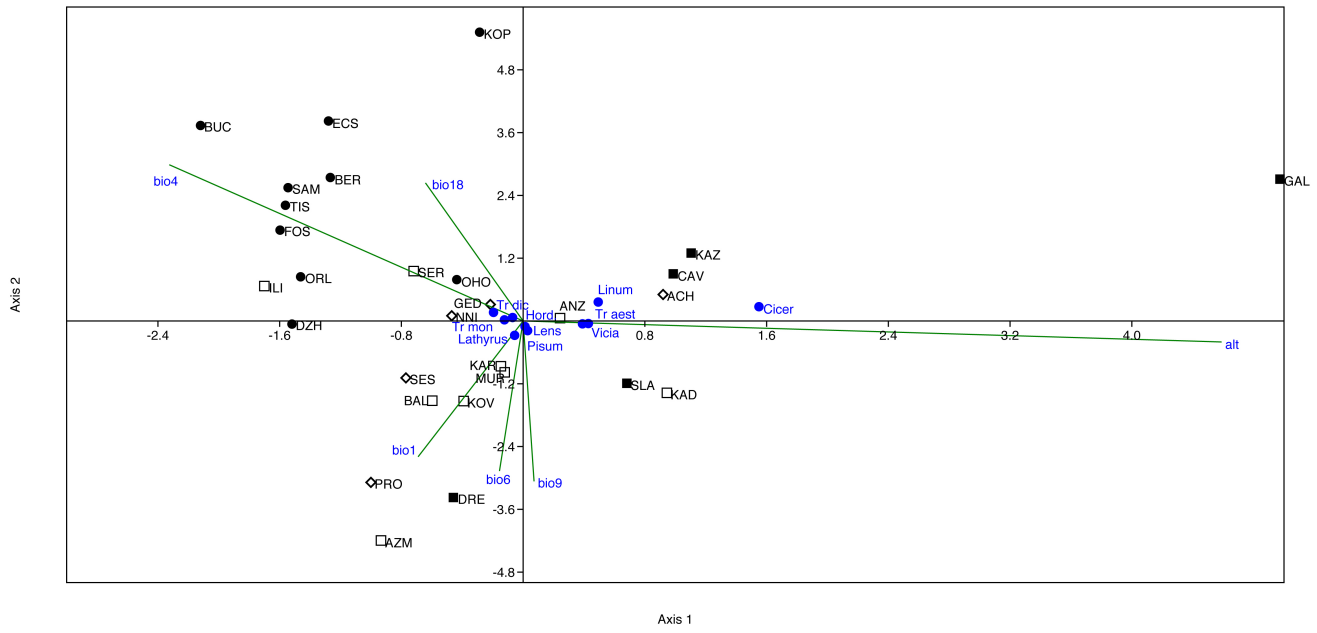

**Plot B.** CCA ordination based on seed counts of domestic taxa.
